# Supplementary material for: Water as a Source of Antimicrobial Resistance and Healthcare-Associated Infections
Source: PubMed Central journal article supplement (PMC7459458; doi:10.3390/pathogens9080667), 2020-08-18
Supplement: pathogens-09-00667-s001.pdf [file pathogens-09-00667-s001.pdf]

**Table S1.** Summary of reports and studies identifying AMR bacterial species within healthcare water sources and water-related devices during outbreak investigation, environmental screening, and molecular epidemiology.

| Study Site | Reservoir                                 | Organism                                                                                                                                                                                                                                   | Country*  | Study Type             | Antimicrobial Methods ∞   | Antimicrobial Characteristics Δ                                                                                                                                                                                 | Reference |
|------------|-------------------------------------------|--------------------------------------------------------------------------------------------------------------------------------------------------------------------------------------------------------------------------------------------|-----------|------------------------|---------------------------|-----------------------------------------------------------------------------------------------------------------------------------------------------------------------------------------------------------------|-----------|
| Hospital   | Water Sink Drain                          | <i>P. aeruginosa</i><br><i>Achromobacter xylosoxidans</i><br><i>Collinsella aerofaciens</i><br><i>Pseudomonas putida</i><br><i>Stenotrophomonas maltophila</i><br><i>P. medocina</i><br><i>C. testosterone</i><br><i>Sphingomonas spp.</i> | France    | Outbreak investigation | Agar dilution, PCR        | blaIMP-19 found in <i>P. aeruginosa</i> , <i>A. xylosoxidans</i> , <i>A. aegrifaciens</i> , <i>P. putida</i> , <i>S. maltophila</i> , <i>P. mendocina</i> , <i>C. testosterone</i> and <i>Sphingomonas spp.</i> | [13]      |
| Hospital   | Sink Drain Bath Shower                    | <i>P. aeruginosa</i>                                                                                                                                                                                                                       | USA*      | Outbreak investigation | Broth microdilution, PGFE | Bathtub isolate resistant to GEN, TOB, TIC and PIP                                                                                                                                                              | [14]      |
| Hospital   | Water                                     | <i>P. aeruginosa</i>                                                                                                                                                                                                                       | France    | Outbreak investigation | Agar diffusion            | Resistant to: TIC, TZP, PIP, CAZ, CIN, FEP, CPR, ATM, GEN, TOB, NET, CIP                                                                                                                                        | [15]      |
| Hospital   | Water Sink Faucets Shower hoses Bath toys | <i>P. aeruginosa</i>                                                                                                                                                                                                                       | Australia | Outbreak investigation | Agar dilution, E-test     | Aminoglycoside-resistant <i>P. aeruginosa</i> isolated from bath toys                                                                                                                                           | [16]      |
| Hospital   | Sink Water                                | <i>P. aeruginosa</i>                                                                                                                                                                                                                       | Mexico*   | Outbreak investigation | Vitek-2, PFGE             | Resistance profile for environmental isolates not reported individually                                                                                                                                         | [17]      |
| Hospital   | Sink                                      | <i>P. aeruginosa</i>                                                                                                                                                                                                                       | Columbia  | Outbreak investigation | Microscan, PCR            | Resistance profile: IMI and positive for blaVIM                                                                                                                                                                 | [18]      |
| Hospital   | Sink Water                                | <i>P. aeruginosa</i>                                                                                                                                                                                                                       | India*    | Outbreak investigation | Disc diffusion            | Resistance reported as whole environmental data                                                                                                                                                                 | [19]      |
| Hospital   | Shower Sink Tap                           | <i>P. aeruginosa</i>                                                                                                                                                                                                                       | Italy     | Outbreak investigation | Vitek-2                   | Resistance profile for environmental samples not reported                                                                                                                                                       | [20]      |
| Hospital   | Water Faucets Sink Drain                  | <i>P. aeruginosa</i>                                                                                                                                                                                                                       | Germany   | Outbreak investigation | Broth dilution            | Carbapenem resistant isolates found                                                                                                                                                                             | [21]      |
| Hospital   | Sink Shower                               | <i>P. aeruginosa</i>                                                                                                                                                                                                                       | Finland   | Outbreak investigation | Disc diffusion            | Environmental resistance profiles reported as total with clinical isolates                                                                                                                                      | [22]      |

|          |                                           |                                                                                                                                                                                                                                                                                                                                               |                |                                                                |                                         |                                                                                                                                                  |      |
|----------|-------------------------------------------|-----------------------------------------------------------------------------------------------------------------------------------------------------------------------------------------------------------------------------------------------------------------------------------------------------------------------------------------------|----------------|----------------------------------------------------------------|-----------------------------------------|--------------------------------------------------------------------------------------------------------------------------------------------------|------|
| Hospital | Water                                     | <i>M. chelonae</i>                                                                                                                                                                                                                                                                                                                            | Mexico         | Outbreak investigation                                         | Broth dilution                          | Resistance reported as whole environmental data                                                                                                  | [23] |
| Hospital | Drain                                     | <i>P. aeruginosa</i>                                                                                                                                                                                                                                                                                                                          | Sweden         | Outbreak investigation                                         | Selective culture                       | 12 drain isolates positive for pae-MBL gene                                                                                                      | [24] |
| Hospital | Sinks                                     | <i>P. aeruginosa</i><br><i>E. cloacae</i><br><i>P. putida</i><br><i>S. maltophilia</i><br><i>C. freundii</i><br><i>Achromobacter denitrificans</i><br><i>Acinetobacter bereziniae</i><br><i>A. hydrophila</i><br><i>Citrobacter amalonaticus</i><br><i>Pseudomonas nitroreducens</i><br><i>Pseudomonas oleovorans</i><br><i>S. marcescens</i> | Germany        | Outbreak investigation                                         | Disc diffusion, E-test, PCR             | Resistance to AMP, SAM, PIP, TZP, CRO, CAZ, IMI, MEM, GEN and CIP                                                                                | [25] |
| Hospital | Sink                                      | <i>P. aeruginosa</i><br><i>P. putida</i>                                                                                                                                                                                                                                                                                                      | UK             | Outbreak investigation                                         | Disc diffusion, Whole genome sequencing | Two sink isolates contained <i>gyrA</i> and <i>parC</i> genes                                                                                    | [26] |
| Hospital | Sink<br>Drain<br>Shower<br>Bath<br>Toilet | <i>K. pneumoniae</i><br>carbapenemase-Producing <i>E. coli</i><br>Carbapenem-resistant <i>Enterobacteriaceae</i>                                                                                                                                                                                                                              | United Kingdom | Outbreak investigation                                         | PCR, Genome sequencing                  | CRE positive isolates from plumbing sites                                                                                                        | [52] |
| Hospital | Water<br>Aerator<br>Bathtub               | <i>Sphingomonas paucomobilis</i>                                                                                                                                                                                                                                                                                                              | Turkey*        | Outbreak investigation                                         | E-test                                  | 2 isolates resistant to CIP and GEN                                                                                                              | [53] |
| Hospital | Sink<br>Bath<br>Shower                    | <i>S. aureus</i>                                                                                                                                                                                                                                                                                                                              | USA            | Outbreak investigation                                         | Disc diffusion                          | Shower isolates positives for mupirocin-resistant <i>S. aureus</i>                                                                               | [54] |
| Hospital | Incubator water                           | <i>K. pneumoniae</i>                                                                                                                                                                                                                                                                                                                          | China          | Outbreak investigation                                         | Disc diffusion, PCR                     | One CRE isolate found in water sample                                                                                                            | [56] |
| Hospital | Water system<br>Tap aeration grids        | <i>P. aeruginosa</i>                                                                                                                                                                                                                                                                                                                          | France         | Hospital environmental isolates v broad environmental isolates | Vitek-2, PCR                            | All strains have genes <i>mer-A</i> like gene, <i>czcA</i> , <i>copA</i> and <i>copB</i> . Isolates demonstrated resistance to Zn, Cu, Cd and Hg | [57] |
| Hospital | Faucet                                    | <i>P. aeruginosa</i>                                                                                                                                                                                                                                                                                                                          | China*         | Clinical isolates v environmental isolates                     | Disc diffusion                          | 6 MDR resistant strains                                                                                                                          | [58] |
| Hospital | Sink                                      | <i>P. aeruginosa</i>                                                                                                                                                                                                                                                                                                                          | Palestine      | Clinical isolates v environmental isolates                     | Disc diffusion, PCR                     | Resistance to TET, KAN. <i>exoT</i> , <i>exoS</i> and <i>exoY</i> detected by PCR                                                                | [59] |
| Hospital | Water                                     | <i>A. baumannii</i>                                                                                                                                                                                                                                                                                                                           | Iran           | Environmental screen                                           | Disc diffusion, PCR                     | Resistance to CAZ and GEN. OXA-23 found in one water sample                                                                                      | [60] |

|          |                                                       |                                                                                                                                                                                                                                                                                                      |                        |                                            |                         |                                                                                                                                                                                                  |      |
|----------|-------------------------------------------------------|------------------------------------------------------------------------------------------------------------------------------------------------------------------------------------------------------------------------------------------------------------------------------------------------------|------------------------|--------------------------------------------|-------------------------|--------------------------------------------------------------------------------------------------------------------------------------------------------------------------------------------------|------|
| Hospital | Taps                                                  | MRSA                                                                                                                                                                                                                                                                                                 | UK                     | Treatment efficacy investigation           | Disc diffusion          | MRSA recovered from every bathroom tested                                                                                                                                                        | [61] |
| Hospital | Sink<br>Tap handle<br>Drain<br>Shower head<br>Aerator | <i>P. aeruginosa</i><br><i>Enterobacter asburiae</i><br><i>Aeromonas caviae</i><br><i>Aeromonas hydrophila</i><br><i>Raoultella planticola</i><br><i>Raoultella ornithinolytica</i><br><i>C. freundii</i><br><i>Pantoea calida</i><br><i>K. oxytoca</i><br><i>E. cloacae</i><br><i>K. pneumoniae</i> | United Kingdom         | Environmental screen                       | N/A                     | <i>K. oxytoca</i> resistant to: GEN, CIP, TZP, CTX, CPD and STR.<br><i>P. calida</i> resistant to: GEN, CIP, CTX and STR.<br><i>R. ornithinolytica</i> resistant to: GEN, CIP, TZP, CTX and CPD. | [62] |
| Hospital | Drain<br>Taps                                         | <i>K. pneumoniae</i>                                                                                                                                                                                                                                                                                 | Norway                 | Outbreak investigation                     | E-test, PCR             | 4 blaKPC-positive <i>K. pneumoniae</i> isolates                                                                                                                                                  | [63] |
| Hospital | Drain<br>Water                                        | <i>Klebsiella quasipneumoniae</i>                                                                                                                                                                                                                                                                    | US                     | Clinical isolates v environmental isolates | Whole genome sequencing | Resistance genes found: blaKPC, <i>fosA</i> , blaOKP and oqxA-opxB                                                                                                                               | [64] |
| Hospital | Water                                                 | <i>Achromobacter bacteriaemia</i>                                                                                                                                                                                                                                                                    | France                 | Outbreak investigation                     | Disc diffusion, PCR     | Resistance reported as whole environmental data                                                                                                                                                  | [65] |
| Hospital | Sink                                                  | <i>Staphylococcus aureus</i>                                                                                                                                                                                                                                                                         | Kenya                  | Outbreak investigation                     | N/A                     | Resistance profile of sink isolates not reported                                                                                                                                                 | [70] |
| Hospital | Sink                                                  | <i>P. aeruginosa</i><br><i>K. pneumoniae</i><br><i>E. coli</i><br><i>Proteus spp.</i><br><i>Staphylococcus citrus</i><br><i>S. aureus</i><br><i>Citrobacter spp.</i><br><i>Staphylococcus epidermidis</i><br><i>Enterobacter spp.</i><br><i>B. cepacia</i><br><i>Alkaligenes faecalis</i>            | United Arab Emirates * | Environmental screen                       | Disc diffusion          | Resistance reported as whole environmental data                                                                                                                                                  | [71] |
| Hospital | Tap                                                   | <i>Staphylococcus spp.</i><br><i>S. aureus</i>                                                                                                                                                                                                                                                       | Italy                  | Environmental screen                       | E-test                  | Resistance reported as whole environmental data                                                                                                                                                  | [72] |
| Hospital | Tap                                                   | <i>Enterobacter spp.</i><br><i>K. pneumoniae</i><br><i>Proteus vulgaris</i><br><i>S. marcescens</i><br><i>S. aureus</i>                                                                                                                                                                              | Uganda                 | Environmental screen                       | Disc diffusion          | Resistance reported as whole environmental data                                                                                                                                                  | [73] |
| Hospital | Sink                                                  | MRSA                                                                                                                                                                                                                                                                                                 | USA                    | Treatment efficacy investigation           | Disc diffusion          | Resistance profile data not reported                                                                                                                                                             | [74] |

|                                |                                             |                                                                                                                                          |          |                                               |                                        |                                                                                                                                   |       |
|--------------------------------|---------------------------------------------|------------------------------------------------------------------------------------------------------------------------------------------|----------|-----------------------------------------------|----------------------------------------|-----------------------------------------------------------------------------------------------------------------------------------|-------|
| Hospital                       | Water                                       | <i>Legionella</i> spp.                                                                                                                   | Spain*   | Environmental screen                          | Broth dilution                         | Resistance to TTPC, DDAC, DBNPA, H <sub>2</sub> O <sub>2</sub> + AgNO <sub>3</sub> , THPS, NaCOI, BZK and MCI                     | [77]  |
| Hospital                       | Sink                                        | <i>Klebsiella pneumoniae</i>                                                                                                             | France   | Outbreak investigation                        | MALDI                                  | 2 OXA-48 positive isolates                                                                                                        | [97]  |
| Hospital                       | Sink drain<br>Tap water                     | <i>S. maltophilia</i>                                                                                                                    | Canada*  | Environmental screen                          | PCR                                    | <i>tetG</i> found in 1 water sample<br><i>ermF</i> found in 1 biofilm sample<br><i>ermX</i> found in 1 biofilm and 1 water sample | [98]  |
|                                |                                             | <i>Chryseobacterium</i> spp.                                                                                                             |          |                                               |                                        |                                                                                                                                   |       |
|                                |                                             | <i>Sphingomonas paucimobilis</i>                                                                                                         |          |                                               |                                        |                                                                                                                                   |       |
|                                |                                             | <i>E. cloacae</i>                                                                                                                        |          |                                               |                                        |                                                                                                                                   |       |
|                                |                                             | <i>Methylobacterium</i> spp.                                                                                                             |          |                                               |                                        |                                                                                                                                   |       |
|                                |                                             | <i>Bosea</i> spp.                                                                                                                        |          |                                               |                                        |                                                                                                                                   |       |
| <i>Acinetobacter johnsonii</i> |                                             |                                                                                                                                          |          |                                               |                                        |                                                                                                                                   |       |
|                                |                                             | <i>Acidovorax</i> spp.                                                                                                                   |          |                                               |                                        |                                                                                                                                   |       |
|                                |                                             | <i>P. aeruginosa</i>                                                                                                                     |          |                                               |                                        |                                                                                                                                   |       |
|                                |                                             | <i>Mycobacterium chelonae</i>                                                                                                            |          |                                               |                                        |                                                                                                                                   |       |
| Hospital                       | Sinks<br>Faucets<br>Drains                  | <i>Elizabethkingia meningoseptica</i>                                                                                                    | China    | Environmental screen                          | Broth microdilution,<br>PCR            | Resistance reported as whole environmental data                                                                                   | [99]  |
| Hospital                       | Hands free taps                             | <i>A. baumannii</i>                                                                                                                      | Japan*   | Outbreak investigation                        | PCR, MLST                              | AMK and CIP resistant strain                                                                                                      | [103] |
| Hospital                       | Sink<br>Tap                                 | <i>Pseudomonas aeruginosa</i>                                                                                                            | India*   | Clinical isolates v<br>environmental isolates | Disc diffusion                         | Environmental resistance profiles reported as total with clinical isolates                                                        | [106] |
| Hospital                       | Sink                                        | <i>E. cloacae</i>                                                                                                                        | England* | Outbreak investigation                        | Rosco tablets                          | Resistance profile for environmental isolates not reported                                                                        | [107] |
| Hospital                       | Sink                                        | <i>P. aeruginosa</i>                                                                                                                     | India*   | Environmental screen                          | Disc diffusion                         | Resistance profiles reported as whole environmental data                                                                          | [108] |
| Hospital                       | Drain-pipe leak                             | <i>E. cloacae</i>                                                                                                                        | India    | Outbreak investigation                        | Disc diffusion                         | Resistant to: AMP, TSU, GEN, CTX, OFX                                                                                             | [109] |
| Hospital                       | Water<br>Drain<br>Basin<br>Shower<br>Toilet | <i>E. cloacae</i>                                                                                                                        | France   | Outbreak investigation                        | Disc diffusion                         | Resistance seen to ADBAC and DDAC from shower and sink drains                                                                     | [110] |
| Hospital                       | Sink                                        | <i>K. pneumoniae</i><br><i>E. cloacae</i> complex<br><i>Citrobacter freundii</i><br><i>Klebsiella oxytoca</i><br><i>Escherichia coli</i> | Belgium  | Outbreak investigation                        | Disc diffusion, Xpert<br>carba-R assay | NDM, KPC and OXA-48 resistance found                                                                                              | [111] |
| Dental office                  | Water                                       | <i>P. aeruginosa</i>                                                                                                                     | Brazil   | Environmental screen                          | Disc diffusion                         | Resistance reported as whole environmental data                                                                                   | [112] |
| Hospital                       | Water                                       | <i>Pseudomonas</i> spp.                                                                                                                  | USA      | Equipment screen                              | Disc diffusion                         | Resistant to 5-10% ethylene glycol                                                                                                | [113] |
| Hospital                       | Water                                       | <i>E. coli</i>                                                                                                                           | Ghana*   | Environmental screen                          | Disc diffusion                         | Resistant to:<br>AMP<br>TET                                                                                                       | [114] |

|          |                                                  |                                                                                                                                                                                                                |               |                                            |                                         |                                                                                 | CHL<br>TSU |
|----------|--------------------------------------------------|----------------------------------------------------------------------------------------------------------------------------------------------------------------------------------------------------------------|---------------|--------------------------------------------|-----------------------------------------|---------------------------------------------------------------------------------|------------|
| Hospital | Sink                                             | <i>E. coli</i><br><i>K. pneumoniae</i><br><i>Klebsiella ozenae</i><br><i>Proteus mirabilis</i><br><i>E. cloacae</i><br><i>Enterobacter aerogenes</i><br><i>Providencia stuartii</i><br><i>Citrobacter spp.</i> | Ethiopia      | Environmental screen                       | Disc diffusion                          | All ESBL resistant to: CPR, CPD, CAZ, CRO and AMC                               | [115]      |
| Hospital | Sink<br>Nebulizer<br>Water                       | <i>P. aeruginosa</i><br><i>Acinetobacter anitratus</i><br><i>E. coli</i><br><i>Proteus spp.</i><br><i>Enterobacter spp.</i>                                                                                    | UK            | Environmental screen                       | Disc diffusion                          | Resistance reported as whole environmental data                                 | [116]      |
| Hospital | Sink                                             | <i>Klebsiella spp.</i><br><i>E. coli</i><br><i>Citrobacter spp.</i><br><i>Enterobacter spp.</i><br><i>Proteus spp.</i><br><i>Aeromonas hydrophilia</i>                                                         | UK            | Outbreak investigation                     | Disc diffusion                          | Resistance reported as whole environmental data                                 | [117]      |
| Hospital | Sink<br>Water                                    | <i>K. pneumoniae</i>                                                                                                                                                                                           | Nigeria       | Outbreak investigation                     | Disc diffusion                          | Resistance profile: AMC, CPR, CAZ, CRO, GEN and CIP                             | [118]      |
| Hospital | Shower head<br>Shower outlets<br>Basin<br>Toilet | <i>S. maltophilia</i>                                                                                                                                                                                          | Germany       | Outbreak investigation                     | Disc diffusion                          | Resistance to TMP-SMX                                                           | [119]      |
| Hospital | Tap                                              | 157 species                                                                                                                                                                                                    | Saudi Arabia* | Environmental screen                       | Microscan                               | Resistance reported as whole environmental data                                 | [120]      |
| Hospital | Drain<br>Sink<br>Shower                          | <i>K. oxytoca</i>                                                                                                                                                                                              | Austria*      | Outbreak investigation                     | Microarray                              | blaKPC and blaTEM found in all isolates. Sink isolates resistant to carbapenems | [121]      |
| Hospital | Water                                            | <i>Burkholderia spp.</i>                                                                                                                                                                                       | Spain         | Clinical isolates v environmental isolates | E-test                                  | Resistance reported as whole environmental data                                 | [122]      |
| Hospital | Sink faucets<br>Sink drains                      | <i>Acinetobacter baumannii</i>                                                                                                                                                                                 | Singapore     | Outbreak investigation                     | Disc diffusion, Whole genome sequencing | No water source isolate identified as resistant                                 | [123]      |
| Hospital | Sink                                             | <i>P. aeruginosa</i><br><i>Serratia liquefaciens</i><br><i>Acinetobacter spp.</i><br><i>Serratia marcescens</i><br><i>E. meningoseptica</i>                                                                    | Oman          | Environmental screen                       | DST                                     | Resistance reported as whole environmental data                                 | [124]      |

| <i>Chryseobacterium indologenes</i> |                               |                                                                                                                           |           |                                            |                               |                                                                                                     |       |
|-------------------------------------|-------------------------------|---------------------------------------------------------------------------------------------------------------------------|-----------|--------------------------------------------|-------------------------------|-----------------------------------------------------------------------------------------------------|-------|
| Hospital                            | Drain Water                   | <i>S. maltophilia</i>                                                                                                     | Thailand  | Clinical isolates v environmental isolates | Disc diffusion                | Greatest resistance seen to CHL, AMK and CST                                                        | [125] |
| Hospital                            | Sink                          | <i>Mycobacterium</i> spp.                                                                                                 | Portugal* | Environmental search                       | Disc diffusion                | Resistance to CIP, CLR, IMI, TOB                                                                    | [126] |
| Hospital                            | Water                         | Enterococci                                                                                                               | India     | Environmental water screen                 | Disc diffusion                | Resistance reported as whole environmental data                                                     | [127] |
| Hospital                            | Sink                          | <i>S. aureus</i><br><i>K. pneumoniae</i><br><i>Acinetobacter</i> spp.<br><i>P. aeruginosa</i><br><i>Enterobacter</i> spp. | Malaysia  | Environmental screen                       | Disc diffusion                | Resistance reported as whole environmental data                                                     | [128] |
| Hospital                            | Water                         | <i>Aeromonas</i> spp.                                                                                                     | Nepal     | Clinical isolates v environmental isolates | Disc diffusion                | 25% of <i>Aeromonas</i> spp. Isolates resistant to NAL                                              | [129] |
| Hospital                            | Water Sinks Showers           | <i>S. marcescens</i>                                                                                                      | Canada*   | Outbreak investigation                     | Agar dilution                 | Sink isolates resistant to AMP, CEF, FOX, TIC, TSU, NIT, KAN, GEN and TOB. Produced ANT2' and AAC6' | [130] |
| Hospital                            | Water                         | <i>E. cloacae</i>                                                                                                         | China     | Outbreak investigation                     | Disc diffusion                | Resistance reported as whole environmental data                                                     | [131] |
| Hospital                            | Sinks Nasogastric water       | <i>A. baumannii</i>                                                                                                       | Taiwan    | Outbreak investigation                     | Disc diffusion, Agar dilution | Outbreak organism found on sink and in nasogastric water                                            | [132] |
| Hospital                            | Sink Water Hydrotherapy tanks | <i>P. aeruginosa</i>                                                                                                      | India*    | Clinical isolates v environmental isolates | Disc diffusion                | Two MBL <i>P. aeruginosa</i> isolates resistant to IMI                                              | [133] |
| Hospital                            | Faucet Basin                  | <i>K. pneumoniae</i>                                                                                                      | Algeria   | Environmental screen                       | Disc diffusion, PCR           | All isolates resistant to AMX, CTX, CRO and TIM                                                     | [134] |
| Hospital                            | Water Sink trap Tap surface   | <i>P. aeruginosa</i>                                                                                                      | China*    | Environmental screen                       | Disc diffusion                | No resistant isolates from water sources                                                            | [135] |

In country, where the study location was not specified in the article, '\*' was denoted with the country of the authors.

∞ Abbreviations: DST, direct susceptibility testing; MALDI-TOF, matrix-assisted laser desorption/ionization-time of flight; MLST, multilocus sequencing typing; PCR, polymerase chain reaction; PFGE, pulse field gel electrophoresis

^ Abbreviations: CRE, carbapenem-resistant *Enterobacteriaceae*; Zn, zinc; Cu, copper; Cd, cadmium; Hg, mercury; MRSA, methicillin resistant *Staphylococcus aureus*; MDR, multi drug resistant; ADBAC, benzalkonium chloride; AMC, amoxicillin; AMK, amikacin; AMP, ampicillin; ATM, aztreonam; BZK, Benzalkonium chloride; CAZ, ceftazidime; CEF, cephalothin; CHL, chloramphenicol; CIN, cinoxacin; CIP, ciprofloxacin; CLR, clarithromycin; CPD, cefpodoxime; CPR, cefprozil; CRO, ceftriaxone; CST, colistin; CTX, cefotaxime; DBNPA, 2,2-dibromo-3-nitropropionamide; DDAC, didecyltrimethyl ammonium chloride; FEP, cefepime ; FOX, ceftoxitin; GEN, gentamicin; H2O2 + AGNO3, Hydrogen peroxide + Silver nitrate, H2O2 + AgNO3; IMI, imipenem ; KAN, kanamycin;

MCL, methylene chloride; MEM, meropenem; NAOCL, Sodium hypochlorite; NET, netilmicin; NIT, nitrofurantoin; OFX, ofloxacin; PIP, piperacillin; SAM, ampicillin-sulbactam; STR, streptomycin; TET, tetracycline; THPS, tetrakis (hydroxymethyl)phosphonium sulfate; TIC, ticarcillin; TMP-SMX, trimethoprim + sulfamethoxazole; TOB, tobramycin; TSU, cotrimoxazole; TTPC, tributyl tetradecyl phosphonium chloride; TZP, piperacillin-tazobactam

## References

106. Aditi; Shariff, M.; Chhabra, S.K.; Rahman, M.U. Similar virulence properties of infection and colonization associated *Pseudomonas aeruginosa*. *J. Med. Microbiol.* **2017**, *66*, 1489–1498, doi:10.1099/jmm.0.000569.
107. Andersen, B.M.; Sørli, D.; Hotvedt, R.; Almdahl, S.M.; Olafsen, K.; George, R.; Gilfillian, A. Multiply beta-lactam resistant *Enterobacter cloacae* infections linked to the environmental flora in a unit for cardiothoracic and vascular surgery. *Scand. J. Infect. Dis.* **1989**, *21*, 181–191, doi:10.3109/00365548909039967.
108. Babu, K.V.Y.; Kumara, A.; Vijayanath, V. Study of imipenem resistant metallo-beta-lactamase positive *Pseudomonas aeruginosa* from different hospital environmental sources. *J. Pure Appl. Microbiol.* **2011**, *5*, 195–203.
109. Banerjee, G.; Ayyagari, A.; Prasad, K.N.; Dhole, T.N.; Singh, S.K. Nosocomial infection due to *Enterobacter cloacae* in a tertiary care hospital in northern India. *Indian J. Med. Res.* **1996**, *103*, 58–61.
110. Chapuis, A.; Amoureux, L.; Bador, J.; Gavalas, A.; Siebor, E.; Chretien, M.L.; Caillot, D.; Janin, M.; de Curraize, C.; Neuwirth, C. Outbreak of extended-spectrum beta-lactamase producing *Enterobacter cloacae* with high MICs of quaternary ammonium compounds in a hematology ward associated with contaminated sinks. *Front. Microbiol.* **2016**, *7*, doi:10.3389/fmicb.2016.01070.
111. De Geyter, D.; Blommaert, L.; Verbraeken, N.; Sevenois, M.; Huyghens, L.; Martini, H.; Covens, L.; Piérard, D.; Wybo, I. The sink as a potential source of transmission of carbapenemase-producing *Enterobacteriaceae* in the intensive care unit. *Antimicrob. Resist. Infect. Control* **2017**, *6*, doi:10.1186/s13756-017-0182-3.
112. De Oliveira, D.V.; Nunes, L.S.; Barth, A.L.; Van Der Sand, S.T. Genetic background of  $\beta$ -lactamases in *Enterobacteriaceae* isolates from environmental samples. *Microb. Ecol.* **2017**, *74*, 599–607, doi:10.1007/s00248-017-0970-6.
113. Du Moulin, G.C.; Doyle, G.O.; MacKay, J.; Hedley-Whyte, J. Bacterial fouling of a hospital closed-loop cooling system by *Pseudomonas* sp. *J. Clin. Microbiol.* **1981**, *13*, 1060–1065.
114. Duedu, K.O.; Offei, G.; Codjoe, F.S.; Donkor, E.S. Multidrug resistant enteric bacterial pathogens in a psychiatric hospital in Ghana: Implications for control of nosocomial infections. *Int. J. Microbiol.* **2017**, *2017*, doi:10.1155/2017/9509087.
115. Engda, T.; Moges, F.; Gelaw, A.; Eshete, S.; Mekonnen, F. Prevalence and antimicrobial susceptibility patterns of extended spectrum beta-lactamase producing *Enterobacteriaceae* in the University of Gondar Referral Hospital environments, northwest Ethiopia. *BMC Res. Notes* **2018**, *11*, doi:10.1186/s13104-018-3443-1.
116. Fujita, K.; Lilly, H.A.; Ayliffe, G.A.J. Spread of resistant Gram-negative bacilli in a burns unit. *J. Hosp. Infect.* **1982**, *3*, 29–37, doi:10.1016/0195-6701(82)90028-7.
117. Hart, C.A. Nosocomial gentamicin- and multiply-resistant *Enterobacteria* at one hospital. 1. Description of an outbreak. *J. Hosp. Infect.* **1982**, *3*, 15–28, doi:10.1016/0195-6701(82)90027-5.
118. Iregbu, K.C.; Anwaal, U. Extended spectrum beta-lactamase-producing *Klebsiella pneumoniae* septicaemia outbreak in the neonatal intensive care unit of a tertiary hospital in Nigeria. *Afr. J. Med. Med. Sci.* **2007**, *36*, 225–228.
119. Kampmeier, S.; Pillukat, M.H.; Pettke, A.; Kossow, A.; Idelevich, E.A.; Mellmann, A. Evaluation of a *Stenotrophomonas maltophilia* bacteremia cluster in hematopoietic stem cell transplantation recipients using whole genome sequencing. *Antimicrob. Resist. Infect. Control* **2017**, *6*, doi:10.1186/s13756-017-0276-y.
120. Khan, M.A.; Al-Motair, K.A.; Alenezi, M.M.; Altheban, A.S.; Hammam, S.A.; Al-Mogbel, M.S. Nosocomial pathogens—A single center study in Saudi Arabia. *J. Pure Appl. Microbiol.* **2018**, *12*, 1411–1416, doi:10.22207/JPAM.12.3.44.
121. Leitner, E.; Zarfel, G.; Luxner, J.; Herzog, K.; Pekard-Amenitsch, S.; Hoenigl, M.; Valentin, T.; Feierl, G.; Grisold, A.J.; Högenauer, C.; et al. Contaminated handwashing sinks as the source of a clonal outbreak of KPC-2-producing *Klebsiella oxytoca* on a hematology ward. *Antimicrob. Agents Chemoth.* **2015**, *59*, 714–716, doi:10.1128/AAC.04306-14.
122. Medina-Pascual, M.J.; Valdezate, S.; Villalon, P.; Garrido, N.; Rubio, V.; Saez-Nieto, J.A. Identification, molecular characterisation and antimicrobial susceptibility of genomovars of the *Burkholderia cepacia* complex in Spain. *Eur. J. Clin. Microbiol. Infect. Dis.* **2012**, *31*, 3385–3396, doi:10.1007/s10096-012-1707-6.
123. Ng, C.; Tay, M.; Tan, B.; Le, T.H.; Haller, L.; Chen, H.J.; Koh, T.H.; Barkham, T.M.S.; Gin, K.Y.H. Characterization of metagenomes in urban aquatic compartments reveals high prevalence of clinically relevant antibiotic resistance genes in wastewaters. *Front. Microbiol.* **2017**, *8*, doi:10.3389/fmicb.2017.02200.



124. Nzeako, B.C.; Al Daughari, H.; Al Lamki, Z.; Al Rawas, O. Nature of bacteria found on some wards in Sultan Qaboos University Hospital, Oman. *Br. J. Biomed. Sci.* **2006**, *63*, 55–58, doi:10.1080/09674845.2006.11732720.
125. Paoprudit, P.; Srinitiwarawong, K.; Ingviya, N.; Singkhamanan, K.; Vuddhakul, V. Distribution and characterization of *Stenotrophomonas maltophilia* isolates from environmental and clinical samples in Thailand. *J. Hosp. Infect.* **2017**, *97*, 185–191, doi:10.1016/j.jhin.2017.06.006.
126. Pereira, S.G.; Cardoso, O. Mobile genetic elements of *Pseudomonas aeruginosa* isolates from hydrotherapy facility and respiratory infections. *Clin. Microbiol. Infect.* **2014**, *20*, O203–O206, doi:10.1111/1469-0691.12359.
127. Peter, A.; Mathew, J.; Zacharia, S. Antibiotic resistant enterococci from drinking water sources. *Asian J. Pharmaceut. Clin. Res.* **2012**, *5*, 158–160.
128. Phoon, H.Y.P.; Hussin, H.; Hussain, B.M.; Lim, S.Y.; Woon, J.J.; Er, Y.X.; Thong, K.L. Distribution, genetic diversity and antimicrobial resistance of clinically important bacteria from the environment of a tertiary hospital in Malaysia. *J. Glob. Antimicrob. Resist.* **2018**, *14*, 132–140, doi:10.1016/j.jgar.2018.02.022.
129. Pokhrel, B.M.; Thapa, N. Prevalence of *Aeromonas* in different clinical and water samples with special reference to gastroenteritis. *Nepal Med. Coll. J.* **2004**, *6*, 139–143.
130. Simor, A.E.; Wilcox, L. Molecular and epidemiologic study of multiresistant *Serratia marcescens* infections in a spinal cord injury rehabilitation unit. *Infection Control Hosp. Epidemiol.* **1988**, *9*, 20–27, doi:10.1086/645728.
131. Wang, C.C.; Chu, M.L.; Ho, L.J.; Hwang, R.C. Analysis of plasmid pattern in paediatric intensive care unit outbreaks of nosocomial infection due to *Enterobacter cloacae*. *J. Hosp. Infect.* **1991**, *19*, 33–40, doi:10.1016/0195-6701(91)90126-S.
132. Wang, S.H.; Sheng, W.H.; Chang, Y.Y.; Wang, L.H.; Lin, H.C.; Chen, M.L.; Pan, H.J.; Ko, W.J.; Chang, S.C.; Lin, F.Y. Healthcare-associated outbreak due to pan-drug resistant *Acinetobacter baumannii* in a surgical intensive care unit. *J. Hosp. Infect.* **2003**, *53*, 97–102, doi:10.1053/jhin.2002.1348.
133. Yogeesh Babu, K.V.; Vijayanath, V.; Niranjana, H.P.; Anitha, M.R. Study of imipenem resistant metallo-beta-lactamase positive *Pseudomonas aeruginosa* from burns wound infections, environmental sources and impact of infection control measures in a burns care center. *J. Pure Appl. Microbiol.* **2011**, *5*, 695–703.
134. Zenati, K.; Sahli, F.; Garcia, V.; Bakour, S.; Belhadi, D.; Rolain, J.M.; Touati, A. Occurrence and clonal diversity of multidrug-resistant *Klebsiella pneumoniae* recovered from inanimate surfaces in Algerian hospital environment: First report of *armA*, *qnrB* and *aac(6′)-Ib-cr* genes. *J. Glob. Antimicrob. Resist.* **2017**, *10*, 148–153, doi:10.1016/j.jgar.2017.05.015
135. Zhou, Z.; Hu, B.; Gao, X.; Bao, R.; Chen, M.; Li, H. Sources of sporadic *Pseudomonas aeruginosa* colonizations/infections in surgical ICUs: Association with contaminated sink trap. *J. Infect. Chemother.* **2016**, *22*, 450–455, doi:10.1016/j.jiac.2016.03.016
